# Supplementary material
Source: HighWire-hosted journal article supplement (https://cmajopen.ca/content/suppl/2017/11/08/5.4.E779)
Supplement: Reviewer_comments_2017-0123.pdf [file Reviewer_comments_2017-0123.pdf]

|                                            |                                                                                                                                                                                                                                                                                                                                                                                                                                                                                                                                                                                                                                                                                                                                                                                                                                                                                                                                                                                                                                                                                                                                                                                                                                                                                                                                                                                                                                                                                                                                                                                                                                                                                                                                                                                                                                                                                                                                                                                                                                                                                                                                                                                                                                                                                                                                                                                                                                                                                                                                                                                                                                                                                                                                                                                                                                                                                                                                                                                                                                                                                                                                                                                                                                                                                                                                                                                                                                                                                                                                                                                                                                                                                                                                                                                                                                                                                                                                                                                                                                                                                                                                                                                                                                                                                                                                                                                                                                                                                                                                                                                                                                                                                                                                                                                                                                                                                                                                                                                                                                                                                                                                                                                                                                                                                                                                                                                                                                                                                                                                                                                                                                                                                                                                                                                                                                                                                                                                                                                                                                                                                                                                                                                                                                                                                                                                                                                                                                                                                                                                                                                                                                                                                                                                                                                                                                                                                                                                                                                                                                                                      |
|--------------------------------------------|----------------------------------------------------------------------------------------------------------------------------------------------------------------------------------------------------------------------------------------------------------------------------------------------------------------------------------------------------------------------------------------------------------------------------------------------------------------------------------------------------------------------------------------------------------------------------------------------------------------------------------------------------------------------------------------------------------------------------------------------------------------------------------------------------------------------------------------------------------------------------------------------------------------------------------------------------------------------------------------------------------------------------------------------------------------------------------------------------------------------------------------------------------------------------------------------------------------------------------------------------------------------------------------------------------------------------------------------------------------------------------------------------------------------------------------------------------------------------------------------------------------------------------------------------------------------------------------------------------------------------------------------------------------------------------------------------------------------------------------------------------------------------------------------------------------------------------------------------------------------------------------------------------------------------------------------------------------------------------------------------------------------------------------------------------------------------------------------------------------------------------------------------------------------------------------------------------------------------------------------------------------------------------------------------------------------------------------------------------------------------------------------------------------------------------------------------------------------------------------------------------------------------------------------------------------------------------------------------------------------------------------------------------------------------------------------------------------------------------------------------------------------------------------------------------------------------------------------------------------------------------------------------------------------------------------------------------------------------------------------------------------------------------------------------------------------------------------------------------------------------------------------------------------------------------------------------------------------------------------------------------------------------------------------------------------------------------------------------------------------------------------------------------------------------------------------------------------------------------------------------------------------------------------------------------------------------------------------------------------------------------------------------------------------------------------------------------------------------------------------------------------------------------------------------------------------------------------------------------------------------------------------------------------------------------------------------------------------------------------------------------------------------------------------------------------------------------------------------------------------------------------------------------------------------------------------------------------------------------------------------------------------------------------------------------------------------------------------------------------------------------------------------------------------------------------------------------------------------------------------------------------------------------------------------------------------------------------------------------------------------------------------------------------------------------------------------------------------------------------------------------------------------------------------------------------------------------------------------------------------------------------------------------------------------------------------------------------------------------------------------------------------------------------------------------------------------------------------------------------------------------------------------------------------------------------------------------------------------------------------------------------------------------------------------------------------------------------------------------------------------------------------------------------------------------------------------------------------------------------------------------------------------------------------------------------------------------------------------------------------------------------------------------------------------------------------------------------------------------------------------------------------------------------------------------------------------------------------------------------------------------------------------------------------------------------------------------------------------------------------------------------------------------------------------------------------------------------------------------------------------------------------------------------------------------------------------------------------------------------------------------------------------------------------------------------------------------------------------------------------------------------------------------------------------------------------------------------------------------------------------------------------------------------------------------------------------------------------------------------------------------------------------------------------------------------------------------------------------------------------------------------------------------------------------------------------------------------------------------------------------------------------------------------------------------------------------------------------------------------------------------------------------------------------------------------------|
| <b>Article details: 2017-0123</b>          |                                                                                                                                                                                                                                                                                                                                                                                                                                                                                                                                                                                                                                                                                                                                                                                                                                                                                                                                                                                                                                                                                                                                                                                                                                                                                                                                                                                                                                                                                                                                                                                                                                                                                                                                                                                                                                                                                                                                                                                                                                                                                                                                                                                                                                                                                                                                                                                                                                                                                                                                                                                                                                                                                                                                                                                                                                                                                                                                                                                                                                                                                                                                                                                                                                                                                                                                                                                                                                                                                                                                                                                                                                                                                                                                                                                                                                                                                                                                                                                                                                                                                                                                                                                                                                                                                                                                                                                                                                                                                                                                                                                                                                                                                                                                                                                                                                                                                                                                                                                                                                                                                                                                                                                                                                                                                                                                                                                                                                                                                                                                                                                                                                                                                                                                                                                                                                                                                                                                                                                                                                                                                                                                                                                                                                                                                                                                                                                                                                                                                                                                                                                                                                                                                                                                                                                                                                                                                                                                                                                                                                                                      |
| Title                                      | Availability of naloxone in Canadian pharmacies: a population-based survey                                                                                                                                                                                                                                                                                                                                                                                                                                                                                                                                                                                                                                                                                                                                                                                                                                                                                                                                                                                                                                                                                                                                                                                                                                                                                                                                                                                                                                                                                                                                                                                                                                                                                                                                                                                                                                                                                                                                                                                                                                                                                                                                                                                                                                                                                                                                                                                                                                                                                                                                                                                                                                                                                                                                                                                                                                                                                                                                                                                                                                                                                                                                                                                                                                                                                                                                                                                                                                                                                                                                                                                                                                                                                                                                                                                                                                                                                                                                                                                                                                                                                                                                                                                                                                                                                                                                                                                                                                                                                                                                                                                                                                                                                                                                                                                                                                                                                                                                                                                                                                                                                                                                                                                                                                                                                                                                                                                                                                                                                                                                                                                                                                                                                                                                                                                                                                                                                                                                                                                                                                                                                                                                                                                                                                                                                                                                                                                                                                                                                                                                                                                                                                                                                                                                                                                                                                                                                                                                                                                           |
| Authors                                    | Alex M. Cressman MD MSc, Graham Mazereeuw PhD, Qi Guan BMSc, Wenting Jia DSc, Tara Gomes MHSc PhD, David N. Juurlink MD PhD                                                                                                                                                                                                                                                                                                                                                                                                                                                                                                                                                                                                                                                                                                                                                                                                                                                                                                                                                                                                                                                                                                                                                                                                                                                                                                                                                                                                                                                                                                                                                                                                                                                                                                                                                                                                                                                                                                                                                                                                                                                                                                                                                                                                                                                                                                                                                                                                                                                                                                                                                                                                                                                                                                                                                                                                                                                                                                                                                                                                                                                                                                                                                                                                                                                                                                                                                                                                                                                                                                                                                                                                                                                                                                                                                                                                                                                                                                                                                                                                                                                                                                                                                                                                                                                                                                                                                                                                                                                                                                                                                                                                                                                                                                                                                                                                                                                                                                                                                                                                                                                                                                                                                                                                                                                                                                                                                                                                                                                                                                                                                                                                                                                                                                                                                                                                                                                                                                                                                                                                                                                                                                                                                                                                                                                                                                                                                                                                                                                                                                                                                                                                                                                                                                                                                                                                                                                                                                                                          |
| <b>Reviewer 1</b>                          | Z. Samaan                                                                                                                                                                                                                                                                                                                                                                                                                                                                                                                                                                                                                                                                                                                                                                                                                                                                                                                                                                                                                                                                                                                                                                                                                                                                                                                                                                                                                                                                                                                                                                                                                                                                                                                                                                                                                                                                                                                                                                                                                                                                                                                                                                                                                                                                                                                                                                                                                                                                                                                                                                                                                                                                                                                                                                                                                                                                                                                                                                                                                                                                                                                                                                                                                                                                                                                                                                                                                                                                                                                                                                                                                                                                                                                                                                                                                                                                                                                                                                                                                                                                                                                                                                                                                                                                                                                                                                                                                                                                                                                                                                                                                                                                                                                                                                                                                                                                                                                                                                                                                                                                                                                                                                                                                                                                                                                                                                                                                                                                                                                                                                                                                                                                                                                                                                                                                                                                                                                                                                                                                                                                                                                                                                                                                                                                                                                                                                                                                                                                                                                                                                                                                                                                                                                                                                                                                                                                                                                                                                                                                                                            |
| Institution                                | Department of Psychiatry and Behavioral Neurosciences, McMaster University, Hamilton, Ont.                                                                                                                                                                                                                                                                                                                                                                                                                                                                                                                                                                                                                                                                                                                                                                                                                                                                                                                                                                                                                                                                                                                                                                                                                                                                                                                                                                                                                                                                                                                                                                                                                                                                                                                                                                                                                                                                                                                                                                                                                                                                                                                                                                                                                                                                                                                                                                                                                                                                                                                                                                                                                                                                                                                                                                                                                                                                                                                                                                                                                                                                                                                                                                                                                                                                                                                                                                                                                                                                                                                                                                                                                                                                                                                                                                                                                                                                                                                                                                                                                                                                                                                                                                                                                                                                                                                                                                                                                                                                                                                                                                                                                                                                                                                                                                                                                                                                                                                                                                                                                                                                                                                                                                                                                                                                                                                                                                                                                                                                                                                                                                                                                                                                                                                                                                                                                                                                                                                                                                                                                                                                                                                                                                                                                                                                                                                                                                                                                                                                                                                                                                                                                                                                                                                                                                                                                                                                                                                                                                           |
| General comments (author response in bold) | <p>This manuscript used a survey style quality improvement initiative to identify the availability of naloxone in Canadian community pharmacies. Using a random sampling accounting for the population size per geographic area, the authors made telephone calls to 429 pharmacies asking about the availability of naloxone on the day of the call or the possibility of obtaining it within a week. The study rationale is based on the current Canadian opioid crisis and the increase in opioid-related overdose mortality. The availability of opioid antidote (naloxone) can save lives by making available for people at risk of overdose, that is why it was made accessible without a prescription, however, the cost of obtaining it and the availability in community pharmacies varied greatly among the provinces. This is an important study highlighting the disparity among various regions of the country including access and cost of naloxone. The authors argued that their findings “emphasize the need for increased availability of naloxone across Canada”.</p> <p>The manuscript is well written and the study is important however the conclusions are beyond the scope of this study as the lack of naloxone in the sampled pharmacies does not automatically mean that naloxone is not available through other means such as harm reduction sites. There are significant limitations that need to be addressed and the study can be strengthened based on the following specific comments:</p> <ol style="list-style-type: none"> <li>Background and the study rationale: <ol style="list-style-type: none"> <li>The rationale does not provide any data or evidence on the effectiveness of naloxone use in the community<br/> <b>We thank the reviewer for this comment. Naloxone can be highly effective in the community, with multiple studies illustrating a reduction in opioid-related mortality at the community level and thousands of opioid overdose “rescues” following the introduction of community-based naloxone programs. (7-11) We now cite these studies in the revised manuscript.</b></li> <li>The frequency of its use by patients with chronic pain and prescribed opioids compared to patients with opioid use disorder,<br/> <b>We know of no studies specifically contrasting the frequency of use of naloxone among patients prescribed opioids for chronic pain and those with a documented opioid use disorder. Presumably, naloxone use in the former group would be considerably lower, even though roughly 1 in 4 misuse opioids in some way.(12) Importantly, these patients greatly outnumber those with a documented opioid use disorder. As discussed in our response to Reviewer 1, naloxone has an important public health role for these patients as well, and pharmacists are arguably the health professionals best positioned to promote its wider availability. It is not difficult to envision how this could save lives. Several studies demonstrate the acceptability of take-home naloxone for patients receiving opioids for chronic pain. (13,14) In these studies, most patients report that receiving education about opioid risks and having naloxone available in the event of overdose are beneficial, and that they would not be offended if offered the product.</b></li> <li>There are no data provided on the frequency of dispensing naloxone by community pharmacies versus other sources such as harm reduction sites, supervised consumption sites, addiction clinics, emergency rooms, among others.<br/> <b>Please see our reply to Reviewer 1. While naloxone can be obtained from other sources, this is generally limited to patients with addiction.</b></li> <li>How effective is naloxone when used in the community by lay persons in reducing mortality from an opioid overdose?<br/> <b>Naloxone can be highly effective when used in the community. Please see our response above.</b></li> <li>Naloxone “kit” is not a kit although this term has been used it is a vial with naloxone, an instruction sheet, someone has to draw the drug into a syringe, etc.... what is the rate of proper use by lay persons?<br/> <b>We have removed reference to “kits”. Although we are aware of no data examining proper use of naloxone by laypeople, this will surely be improved by pharmacists trained to deliver detailed instructions at the time naloxone is provided.</b></li> </ol> </li> <li>Methods: <ol style="list-style-type: none"> <li>What was the randomization method used to select the ~500 pharmacies? This was not mentioned in details, at the end of the “identification...” section the authors stated that they used random number generator to reduce “sampling bias”<br/> <b>In the revised manuscript, we have added a few sentences (page 4) and, should the editors wish it, a flow diagram describing the use of a random number generator to identify pharmacies. Briefly, all pharmacies within a jurisdiction were numbered in sequence, and a random number generator (with n = the jurisdiction population size) was used to select sites. More detail is offered below in response 2f.</b></li> <li>Why exclude the sites that disclosed the list of pharmacies dispensing naloxone? If randomization is used to select the pharmacies, should this be then balancing the distribution of those who do dispense and those who don’t?<br/> <b>We excluded Alberta and Manitoba because they provided information online to identify pharmacies with naloxone. Although randomization reduced bias in the selection of pharmacies, it was done without knowledge of naloxone status, and would not be expected to yield balance in the availability of naloxone. In our view, presenting the full data on these provinces where available was the most accurate way of reporting this.</b></li> <li>Why choose 500?<br/> <b>We chose 500 on the basis of pragmatism, because contacting all of Canada’s ~10,000 pharmacies by phone would not have been practical. Our sample represents nearly 5% of all community pharmacies in Canada.</b></li> <li>Why choose a week as the duration to obtain naloxone if not ready on the day of call?<br/> <b>Most pharmacies can obtain drugs from their distributors within 1 to 2 business days. We chose a one week metric to avoid exaggerating the extent of non-availability.</b></li> <li>Under “identification” 2nd paragraph “...with a larger proportion of pharmacies sampled in PEI (n=5) and the Territories (n=5)”, thought the authors set n=5 as the minimum unit, please clarify.<br/> <b>We thank the reviewer for this comment and now clarify this in the revised manuscript (page 4). Briefly, we set the minimum number of sites to sample within each jurisdiction at 5. Because of this, we deliberately sampled a larger proportion of pharmacies in less populous jurisdictions such as Prince Edward Island and the territories.</b></li> </ol> </li> </ol> |

f. Please provide a flow diagram of the selection process  
**A flow diagram has been added (in Appendix). Please see below.**

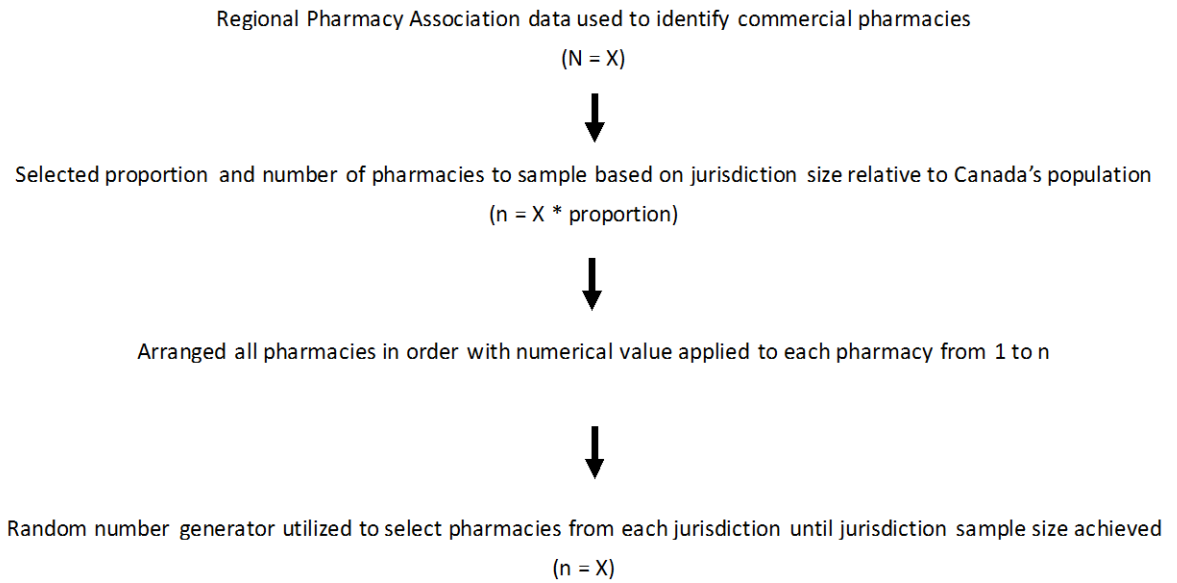

g. Please use the reporting guidelines for quality improvement studies (SQUIRE) to improve the standard of reporting, transparency, and reproducibility. See the EQUATOR Network site.  
**We thank the reviewer for this suggestion and have adjusted our manuscript accordingly. We believe these changes have improved the transparency and the reproducibility of our work.**

3. Results:

a. Second paragraph, 2nd line: please replace “ranged” which is a statistical term means the difference between max and min values with varied.  
**We now use the word “varied” (page 5).**

b. There is an important point that was a missed opportunity in this study which the perception of pharmacists of opioid use and naloxone dispensing. What is the level of training they receive  
 While an examination of pharmacists’ attitudes toward naloxone would have been interesting, this was not the focus of our study. In the revised manuscript, we now outline in general terms the training process pharmacists complete, using Ontario and Alberta as examples. In brief, pharmacists must take an online training course that improves their understanding of the Take Home Naloxone program and explains the pharmacist’s role as a participant. Such courses inform pharmacists about:

- 1) Principles of harm reduction,
- 2) How to identify at-risk individuals (such as those individuals receiving high doses of opioids,
- 3) Contents of a Take Home Naloxone kit,
- 4) Counseling and proper administration of naloxone

What are the unmet needs to implement the availability of naloxone in every pharmacy,  
**This has not been studied. If naloxone were used only for opioid addiction, it might not be needed in every pharmacy, particularly when several exist in close proximity. However, given its role in patients receiving high-dose opioids by prescription, a case can be made for making it available in every pharmacy. In the revised manuscript, we speculate about some of the unmet needs, including: 1) balancing supply and demand and 2) cost to corporations and distributors.**

What are the associated concerns about risks associated with its use, any stigma associated with opioid use disorder that could impact the willingness of community pharmacists to obtain naloxone?  
**Naloxone is an exceedingly safe medication, with opioid withdrawal (unpleasant but temporary) as its primary adverse effect. Although opioid addiction is associated with stigma, it also represents an immediate threat to life, particularly with the profusion of clandestinely-produced fentanyl in the illicit drug supply. In the revised manuscript, we have included that pharmacists may voice concern about precipitating withdrawal, but that the risks of opioid overdose and death greatly exceed the risk of opioid withdrawal.**

4. Interpretation:

a. To increase naloxone access, the location and responsibility should not lie within the community pharmacies alone, there are many other sites and resources that were not captured by this study and therefore we can not conclude that access is limited because it is not available at every pharmacy. A more balanced argument with a clear acknowledgment of the current study limitations should be made.  
**See our response to Reviewer 1. Our revised discussion section notes the availability of naloxone from other sources, but also emphasizes that i) its distribution should not be limited to those with an opioid use disorder, and ii) its availability is particularly important in centres where supervised consumption sites, addiction clinics, etc. are less accessible.**

|                    |                                                                                                     |
|--------------------|-----------------------------------------------------------------------------------------------------|
| <b>Reviewer 2</b>  | Bruna Brands                                                                                        |
| <b>Institution</b> | Centre for Addiction and Mental Health, Public Health and Regulatory Policy Research, Toronto, Ont. |

General comments (author response in bold)

This is an important, methodically sound study. The widespread availability of naloxone is an important initiative to address the opioid crisis. I have one minor question/comment. The Government of Canada web page on 'naloxone' (<https://www.canada.ca/en/health-canada/services/substance-abuse/prescription-drug-abuse/opioids/naloxone.html> accessed June 1, 2017) provides information on where to obtain naloxone in a particular province or territory. Although the webpage was last updated on March 21, 2017 the information in the links may have been updated since then. For example if you click on the link to British Columbia you are provided with a map of pharmacy locations where naloxone is available and the kits are free. This is quite a change from the situation reported in the manuscript where 97% of pharmacies in British Columbia required a fee. It would have been interesting to have some further information as to when and when this change occurred and how close were these changes to the posting of information on pharmacies in Alberta and Manitoba where naloxone was available.

**Our study was conducted between January and March 2017 when provincial and federal initiatives to address the opioid crisis were evolving, as they still are.**

**In response to the reviewer's comment, we have again contacted the 32 pharmacies in British Columbia that originally had naloxone and indicated a fee was required to receive it. Of these, all reaffirmed the need for a fee, which in some instances was higher than previously stated. Moreover, some of these pharmacies no longer had naloxone on hand. These data indicate that Government of Canada's website is sometimes inaccurate with regard to both naloxone availability and cost. How did the authors become aware of these postings? Did they routinely check the provincial websites or were they informed through other sources? This is relevant if one considers the short collection period and the fact that the authors rightly excluded the data from Alberta and Manitoba.**

**We closely monitored the medical literature and provincial websites from December to March 2017, and expressly avoided modifying our sampling strategy over time to maintain consistency. Although some jurisdictions now provide access points for naloxone, it is unclear if those databases accurately reflect naloxone access at the pharmacy level. An as-yet unpublished study from the Department of Pharmacology and Toxicology at the University of Toronto found that naloxone was often not available at pharmacies in the Greater Toronto Area indicated as sources on the governmental website. Our study examined pharmacy level data on point of contact which is important and relevant to the consumer.**

#### References

1. Gomes T, Mamdani MM, Dhalla IA, Paterson JM, Juurlink DN. Opioid Dose and Drug-Related Mortality in Patients With Nonmalignant Pain. *Arch Intern Med. American Medical Association*; 2011 Apr 11;171(7):686–91.
2. Gomes T, Mamdani MM, Dhalla IA, Cornish S, Paterson JM, Juurlink DN. The burden of premature opioid-related mortality. *Addiction*. 2014 Sep 1;109(9):1482–8.
3. Dhalla IA, Mamdani MM, Sivilotti MLA, Kopp A, Qureshi O, Juurlink DN. Prescribing of opioid analgesics and related mortality before and after the introduction of long-acting oxycodone. *Canadian Medical Association Journal*. 2009 Dec 7;181(12):891–6.
4. Kaplovitch E, Gomes T, Camacho X, Dhalla IA, Mamdani MM, Juurlink DN. Sex Differences in Dose Escalation and Overdose Death during Chronic Opioid Therapy: A Population-Based Cohort Study. Mintzes B, editor. *PLOS ONE. Public Library of Science*; 2015;10(8):e0134550.
5. Mitchell BD, He X, Sturdy IM, Cagle AP, Settles JA. GLUCAGON PRESCRIPTION PATTERNS IN PATIENTS WITH EITHER TYPE 1 OR DIABETES WITH NEWLY PRESCRIBED INSULIN. <http://dxdoi.org/104158/EP15831OR>. *American Association of Clinical Endocrinologists*; 2017 Oct 20;22(2):123–35.
6. Kerensky T, Walley AY. Opioid overdose prevention and naloxone rescue kits: what we know and what we don't know. *Addiction*. *Sci Clin Pract. BioMed Central*; 2017 Jan 7;12(1):4.
7. Walley AY, Xuan Z, Hackman HH, Quinn E, Doe-Simkins M, Sorensen-Alawad A, et al. Opioid overdose rates and implementation of overdose education and nasal naloxone distribution in Massachusetts: interrupted time series analysis. *BMJ*. 2013 Jan 31;346(jan305):f174–4.
8. Mueller SR, Walley AY, Calcaterra SL, Glanz JM, Binswanger IA. A Review of Opioid Overdose Prevention and Naloxone Prescribing: Implications for Translating Community Programming Into Clinical Practice. *Subst Abus. Routledge*; 2015;36(2):240–53.
9. Clark AK, Wilder CM, Winstanley EL. A Systematic Review of Community Opioid Overdose Prevention and Naloxone Distribution Programs. *Journal of Addiction Medicine*. 2014;8(3):153–63.
10. Coffin PO, Sullivan SD. Cost-effectiveness of distributing naloxone to heroin users for lay overdose reversal. *Ann Intern Med. American College of Physicians*; 2013 Jan 1;158(1):1–9.
11. McDonald R, Strang J. Are take-home naloxone programmes effective? Systematic review utilizing application of the Bradford Hill criteria. *Addiction*. 2016 Jul 1;111(7):1177–87.
12. Vowles KE, McEntee ML, Julnes PS, Frohe T, Ney JP, van der Goes DN. Rates of opioid misuse, abuse, and addiction in chronic pain: a systematic review and data synthesis. *PAIN*. 2015 Apr 1;156(4):569–76.
13. Nielsen S, Peacock A, Lintzeris N, Bruno R. Knowledge of Opioid Overdose and Attitudes to Supply of Take-Home Naloxone Among People with Chronic Noncancer Pain Prescribed Opioids. *PAIN*. 2017.
14. Behar E, Rowe C, Santos G-M, Coffa D, Turner C, Santos NC, et al. Acceptability of Naloxone Co-Prescription Among Primary Care Providers Treating Patients on Long-Term Opioid Therapy for Pain. *J GEN INTERN MED. Springer US*; 2017;32(3):291–5.
